# Supplementary material for: MAN1B1-CDG: Three new individuals and associated biochemical profiles
Source: PubMed Central journal article supplement (PMC8182421; doi:10.1016/j.ymgmr.2021.100775), 2021-06-02
Supplement: mmc1.pdf [file mmc1.pdf]

### Supplementary Figure 1

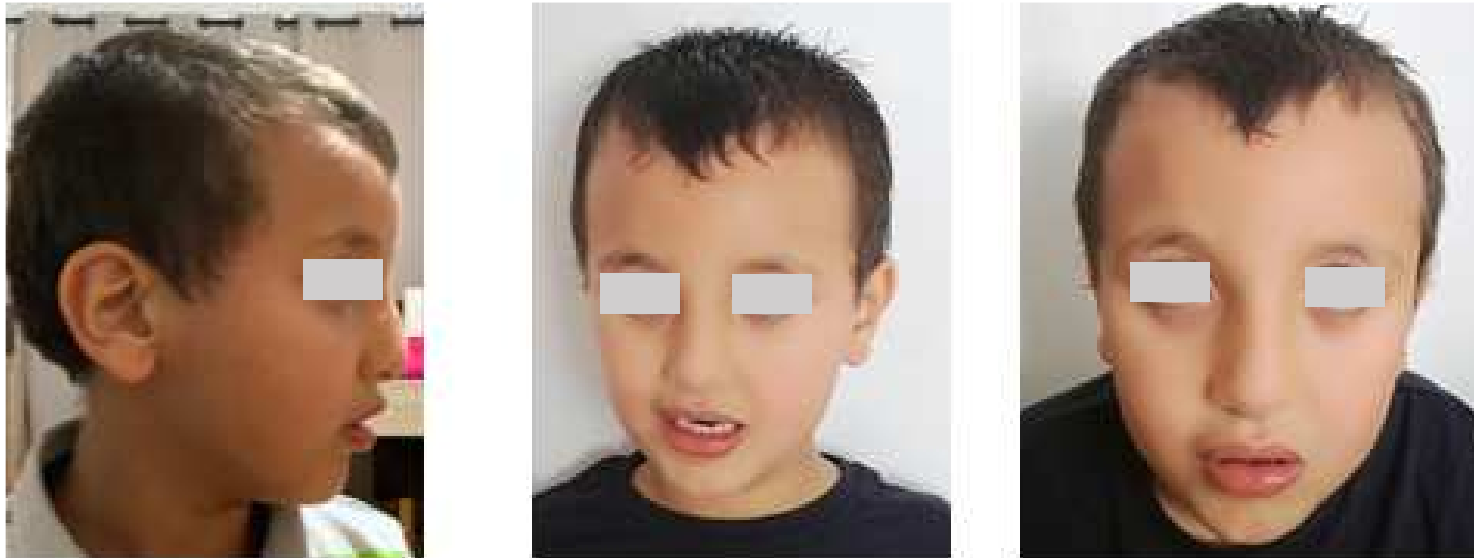

**Fig. S1:** Frontal and lateral photographs of individual P1 at age 5 years with facial features, macrocephaly, epicanthus, hypertelorism.

## Supplementary Figure 2

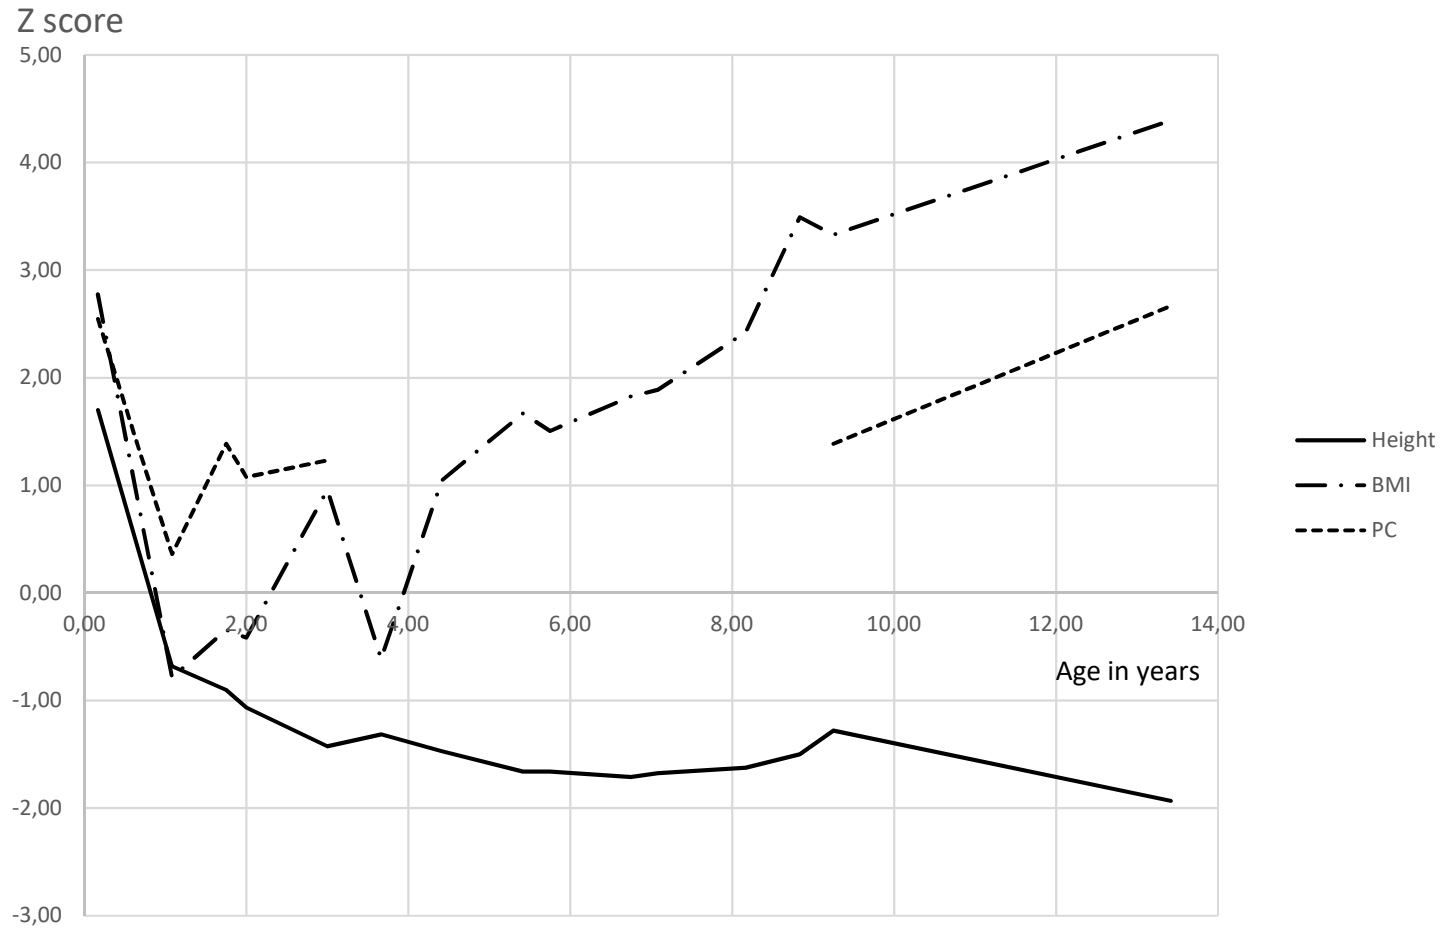

**Fig. S2:** Growth curves of Patient 3. With age, the body mass index (BMI) of Patient 3 progressively increased to reach abnormal level at around 7 year-old. This, by contrast with early abnormally low height.

### Supplementary Figure 3

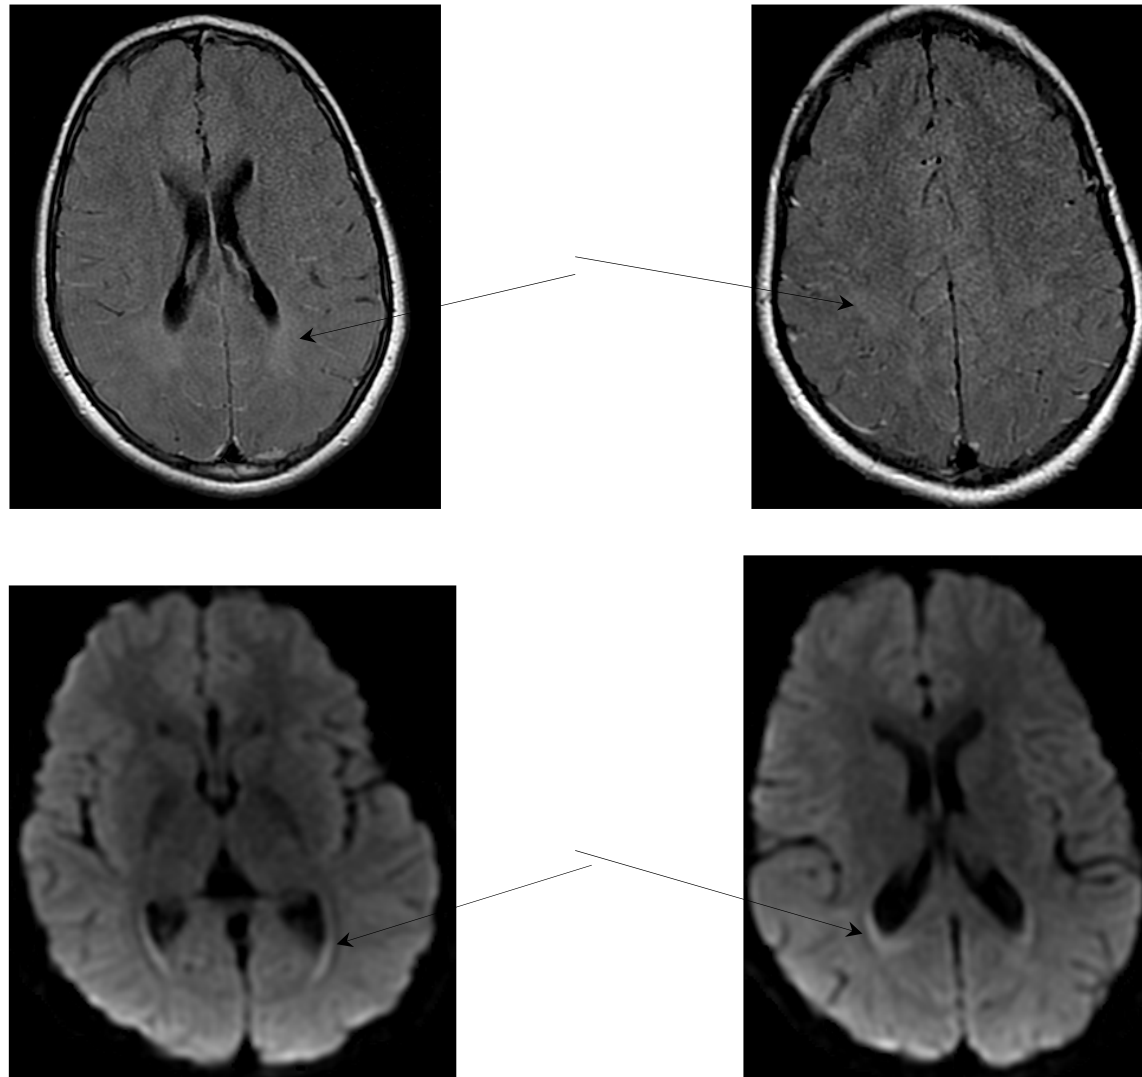

**Fig. S3:** Patient 3' cerebral MRI at 9 years of age. Top pictures, axial FLAIR: slight hypersignal of posterior white matter (arrows). Bottom pictures, axial DWI: thin linear hyperintensity in contact with posterior and occipital ventricular horns (arrows).

Supplementary Figure 4

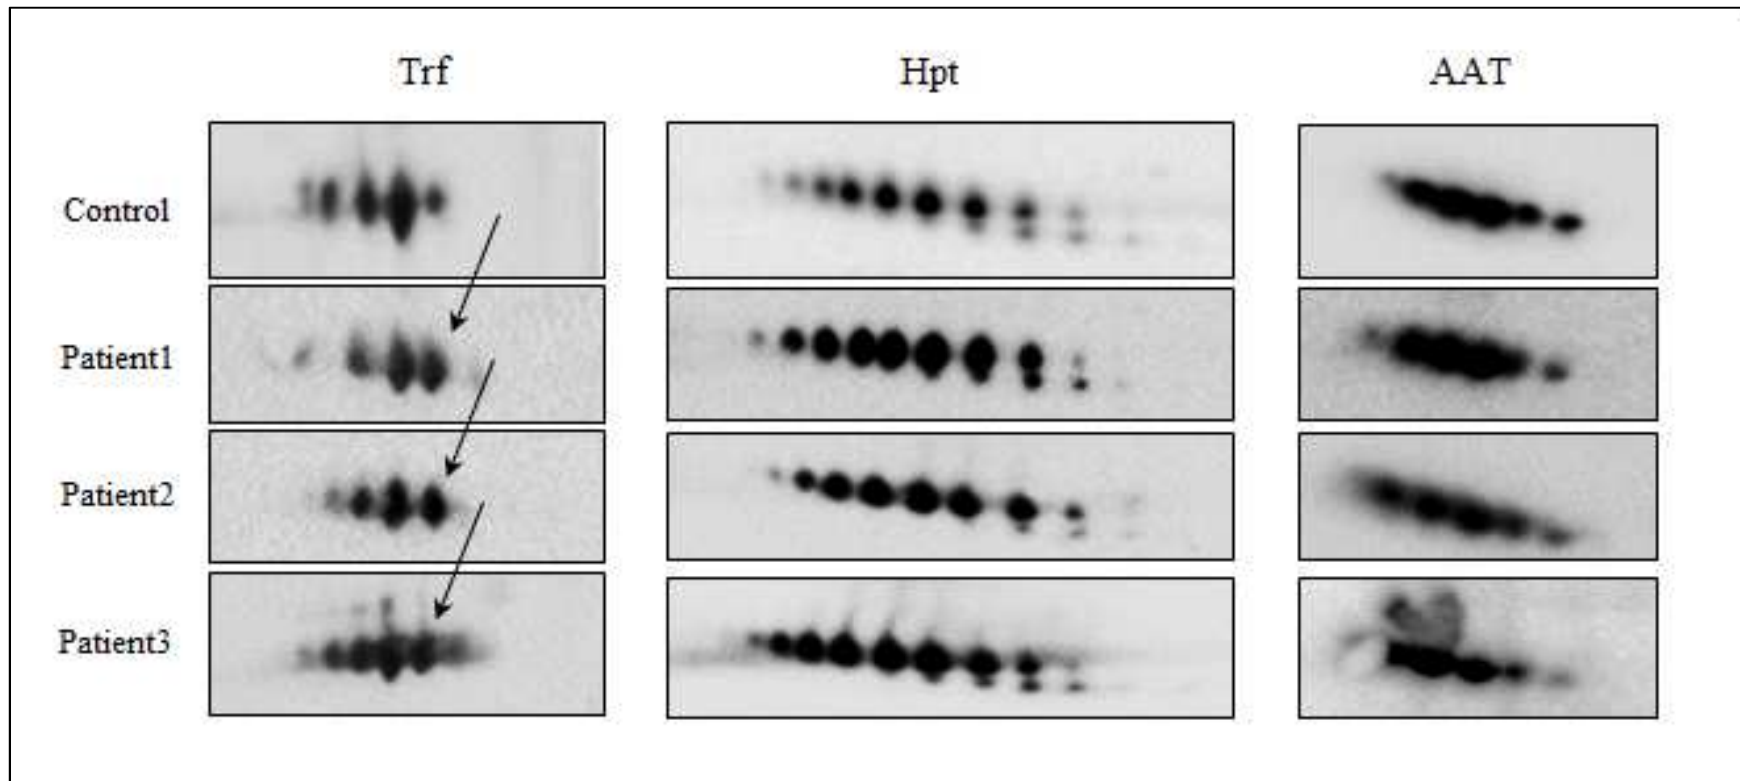

**Fig. S4:** 2-DE of N-glycosylated transferrin (Trf), haptoglobin (Hpt) and  $\alpha$ 1-antitrypsin (A1AT). The 2-DE patterns confirmed the isolated increase of the 3-sialo Trf fraction (black arrows) in the sera of the MAN1B1-CDG patients compared to control. Hpt and AAT patterns of the three individuals were rather indistinguishable from the control.

### Supplementary Figure 5

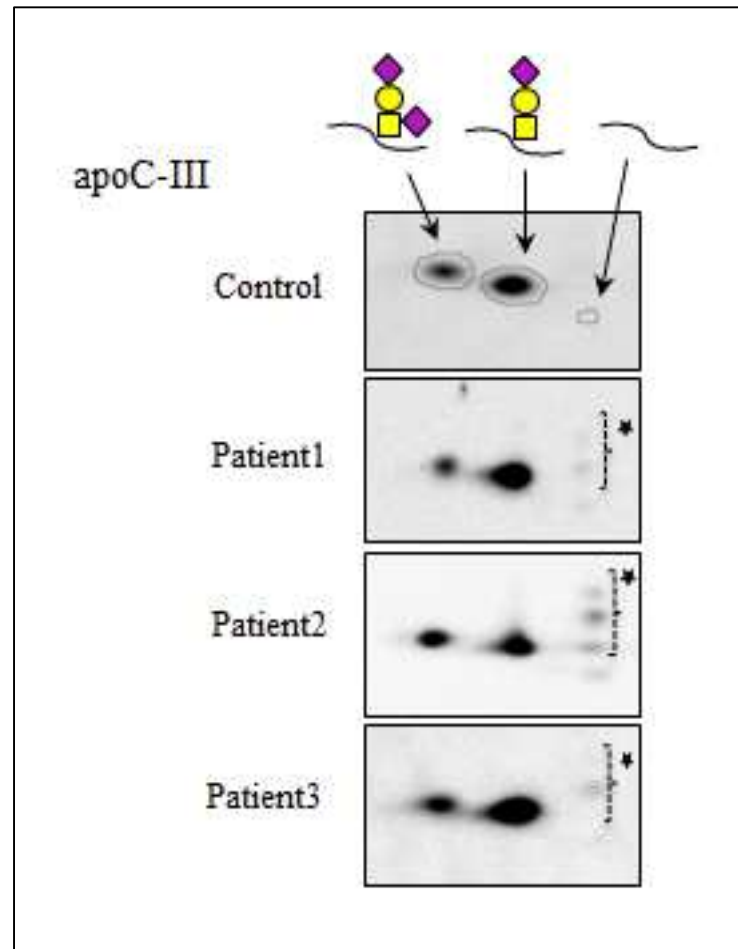

**Fig. S5:** 2-DE of mucin core1 O-glycosylated apoC-III. 2-DE patterns of apoC-III from the sera of the MAN1B1-CDG individuals did not show notable differences compared to control. Black stars indicate minor mucin core2 apoC-III glycoforms, not investigated in this study.
